## Addendum

**Addendum: Histological and molecular analysis of a progressive diffuse intrinsic pontine glioma and synchronous metastatic lesions: a case report****Javad Nazarian<sup>1,2</sup>, Gary E. Mason<sup>3</sup>, Cheng Ying Ho<sup>4</sup>, Eshini Panditharatna<sup>1,6</sup>, Madhuri Kambhampati<sup>1</sup>, L. Gilbert Vezina<sup>5</sup>, Roger J. Packer<sup>7</sup> and Eugene I. Hwang<sup>8</sup>**<sup>1</sup>Center for Genetic Medicine Research, Children's National Medical Center, Washington, DC, USA<sup>2</sup>Department of Integrative Systems Biology, George Washington University School of Medicine and Health Sciences, Washington, DC, USA<sup>3</sup>University of Pittsburgh School of Medicine, Pittsburgh, PA, USA<sup>4</sup>Department of Pathology, Children's National Medical Center, Washington, DC, USA<sup>5</sup>Division of Neuro-radiology, Children's National Medical Center, Washington, DC, USA<sup>6</sup>Institute for Biomedical Sciences, George Washington University School of Medicine and Health Sciences, Washington, DC, USA<sup>7</sup>Brain Tumor Institute, Daniel and Jennifer Gilbert Neurofibromatosis Institute, Neuroscience and Behavioral Medicine, Children's National Medical Center, NW, Washington, DC, USA<sup>8</sup>Center for Cancer and Blood Disorders, Children's National Medical Center, Washington, DC, USA**Published:** May 12, 2023**Copyright:** © 2023 Nazarian et al. This is an open access article distributed under the terms of the [Creative Commons Attribution License](#) (CC BY 3.0), which permits unrestricted use, distribution, and reproduction in any medium, provided the original author and source are credited.**This article has an addendum:** Because this was an autopsy-based analysis, autopsy/donation consent was obtained.Original article: Oncotarget. 2016; 7:42837–42842. <https://doi.org/10.18632/oncotarget.10034>
